# Supplementary material for: CHG: A Systematically Integrated Database of Cancer Hallmark Genes
Source: Front Genet. 2020 Feb 5;11:29. doi: 10.3389/fgene.2020.00029 (PMC7013921; doi:10.3389/fgene.2020.00029)
Supplement: Supplementary Table 4 — Literature validation of TOP10 altered (mutation, methylation, CNV) genes (TCHGs) of each hallmark. [file Table_4.xls]

## Sheet: literatures validation of TCHGs
Supplementary Table 4 literature validation of TOP10 altered (mutation, methylation, CNV) genes (TCHGs) of each hallmark.
Activating Invasion and Metastasis	Literature verification	Evading Growth Suppressors	Literature verification	Evading Immune Destruction	Literature verification	Enabling Replicative Immortality	Literature verification	Genome Instability and Mutation	Literature verification	Inducing Angiogenesis	Literature verification	Resisting Cell Death	Literature verification	Reprogramming Energy Metabolism	Literature verification	Sustaining Proliferative Signaling	Literature verification	Tumor-Promoting Inflammation	Literature verification
ETS1	PMID: 15331930；PMID: 26296467	ETS1	PMID: 21444677;PMID: 25117710	SRC	PMID: 26888964；PMID: 24474940	CTNNB1	PMID: 18006687；PMID: 17218945	TP53	PMID:25621662;PMID:20177397	MAPK1	PMID: 18172299;PMID: 24561529	MAPK1	PMID: 25831013;PMID: 22914360	AKT1	PMID:19130886；PMID:25322691	ETS1	PMID: 23383271；PMID: 19787252	SRC	PMID: 24474940;PMID: 29693170
MAPK1	PMID: 26117268；PMID: 26614994	MAPK1	PMID: 26510428；PMID: 24139413	MAPK14	PMID: 24905917；PMID: 26363230	WNT3A	PMID: 25939383； PMID：15686623	RPA1	PMID:24267891;PMID: 26403191	AKT1	PMID：16775835；PMID：16552185	AKT1	PMID: 21376230;PMID: 15339911;PMID: 23209150	MAPK1	PMID: 23732116；PMID: 18545666	MAPK1	PMID: 26117268；PMID: 24999356	MAPK14	PMID: 25217523；PMID： 29276966
MAPK3	PMID: 22425761；PMID: 11544480	MAPK3	PMID: 24811094；PMID: 27177197	MAPK1	PMID: 26006068；PMID: 29672926	MYC	PMID: 25893605；PMID: 25815289	PCNA	PMID:26711499; PMID：28108661	MAPK3	PMID: 24561529;PMID: 24358167	MAPK3	PMID： 27780136；PMID： 26351820	MAPK3	PMID: 20808308；PMID: 23860205	MAPK3	PMID: 20203690;PMID: 28842696	MAPK1	PMID： 25236577；PMID： 27526131
SRC	PMID: 29500337；PMID: 26695438	AKT1	PMID: 26617940；PMID: 24658401	GNAI3	PMID: 24751948；PMID: 25444921	GSK3B	PMID: 25344882；PMID: 27470346	CDK2	PMID：21769424;PMID：21288923	GRB2	PMID:16076871；PMID:28420432	MYC	PMID: 15549092；PMID: 21376230；PMID: 23209150	MYC	PMID: 19270154；PMID: 21376230；PMID: 25322691	AKT1	PMID: 23298478；PMID: 20167420	MAPK3	PMID： 25236577；PMID： 27526131
MAPK14	PMID: 24145114；PMID: 27036038	HRAS	PMID: 21518958；PMID: 23728347	MAPK3	PMID: 20186879；PMID: 18947405	MAPK1	PMID：25880821；PMID：25869441	RPA2	PMID:17035231;PMID:24267891	SRC	PMID: 24522479;PMID: 22203239	TP53	PMID: 21376230；PMID: 15549092；PMID: 26202022	MAPK14	PMID:20626350；PMID:11274345	MAPK14	PMID: 25110412;PMID: 28983820	AKT1	PMID: 26135667;PMID: 26996309
AKT1	PMID: 28765579；PMID: 26267533	TP53	PMID: 18043262；PMID: 27776972	GNB1	PMID: 25485910；PMID： 23603342	MAPK14	PMID：25880821；PMID：25869441	CDK1	PMID: 25625205; PMID: 25375373	PIK3CA	PMID: 25688137;PMID: 12874030	MAPK14	PMID: 25831013；PMID： 29749797	NTRK1	PMID：23569426；PMID: 29037860	SRC	PMID: 24768768；PMID: 26833126	PRKCA	PMID: 28402280;PMID: 12101411
RAC1	PMID: 26206334；PMID: 25640224	MYC	PMID: 28233639;PMID: 23993963	FYN	PMID: 26441977；PMID：19290918	DVL1	PMID： 16273260；PMID： 29559363	CDK4	PMID：25695927;PMID：12543805	STAT3	PMID: 23734190;PMID: 25410411	SRC	PMID: 21785464；PMID: 22138575；PMID: 24610665	TP53	PMID: 19270154;PMID: 21376230;PMID:26113084	ESR1	PMID: 21541733；PMID: 28439737	MAPK11	PMID: 25217523；PMID:21203968
ESR1	PMID: 24185510；PMID: 26500237	NRAS	PMID: 19247395；PMID: 24811402	MAPK11	PMID: 24905917；PMID: 26363230	WNT1	PMID: 25939383； PMID：15686623	RPA3	PMID:24367615;PMID:27151292	MAPK14	PMID: 25110412;PMID: 24145114	HSP90AA1	PMID: 23135731;PMID: 26071189	CDK2	PMID: 25808870； PMID: 24550143；PMID: 23461792	MYC	PMID: 29725697;PMID: 17404512	GNAI3	PMID： 25444921；PMID： 24751948
MAPK11	PMID: 28702312；PMID: 26666822	YWHAZ	PMID: 29512774；PMID: 23422756	AKT1	PMID: 26002081；PMID: 17121792	MAPK3	PMID：25880821；PMID：25869441	BLM	PMID:26732513;PMID：26358404	PTPN11	PMID: 19008228;PMID: 22512561	JAK2	PMID: 22050790;PMID: 23907460	PRKAA1	PMID： 26843621；PMID： 26934201	MAPK11	PMID: 29296238;PMID: 24905917	RAC1	PMID: 26658759;PMID: 24962779
RHOA	PMID: 26358398；PMID: 26870238	PIK3CA	PMID: 26559013；PMID: 27465249	RAC1	PMID: 24706725；PMID: 27294528	WNT5A	PMID: 25939383； PMID：15686623	MSH2	PMID：10397740;PMID: 10190329	HRAS	PMID：27941888;PMID: 18620523	PIK3CA	PMID: 11959846；PMID: 25501831	PPP2CA	PMID: 28904398;PMID: 27133296	YWHAZ	PMID: 23422756;PMID: 28981108	PIK3CA	PMID: 25625625;PMID: 23792451
MYC	PMID: 26689987；PMID: 26108419	E2F4	PMID: 15525513;PMID: 10779331	CLDN2	PMID: 28754672；PMID: 23423606	TP53	PMID: 23691139；PMID: 25869441	TP73	PMID:19876867;PMID:17227125	ESR1	PMID:29196658；PMID:28664150	E2F4	PMID: 15662116;PMID: 15549092	ELAVL1	PMID： 16155006；PMID： 26346275	E2F4	PMID: 12757710；PMID: 23919615	CLDN2	PMID: 23423606;PMID: 18711353
E2F4	PMID: 22086850；PMID: 24889531	CTNNB1	PMID: 26960970；PMID: 27333864	PTPN11(SHP2)	PMID: 26636629；PMID: 27362227	E2F4	PMID: 11602203；PMID: 12674332	GSTA4	PMID: 27065323;PMID: 28337261	MYC	PMID: 23237807;PMID: 25748238	GRB2	PMID: 23771793;PMID: 15341520	GAPDH	PMID:17671452 ；PMID: 26312920；PMID: 25009227	TP53	PMID: 26205489；PMID: 15603511	ACTB	PMID: 25944999;PMID: 23266771
CTNNB1	PMID: 26915315；PMID: 26758430			GRB2	PMID: 24874471；PMID: 22163099	NFS1	PMID: 29168506；PMID: 29222191	ARNT	PMID:15970707;PMID：20228066	TP53	PMID: 24460348;PMID: 25672981	EGFR	PMID: 25344882;PMID: 23209150	HIF1A	PMID: 21376230；PMID: 26312753；PMID: 24837709；	UBC	PMID: 29382826;PMID: 23660957	HLA-DRB1	PMID: 17360028;PMID: 12691174
HRAS	PMID: 27725900；PMID: 2247480			JAK2	PMID: 25127987；PMID: 26191195	DVL2	PMID： 16273260；PMID： 29559363			CCR5	PMID：25330803；PMID: 27863423							TRAF6	PMID: 29797599;PMID: 25659581
				STAT3	PMID: 25700834；PMID: 25825152	KRAS	PMID: 24633177；PMID: 12085236			TGFB1	PMID: 23868260;PMID: 19041849							GNB1	PMID：19686582;PMID: 29332336
						DVL3	PMID： 16273260；PMID： 29559363；PMID: 23301094
In these results, it was also confirmed that the gene corresponding to both hallmark feature and the cancer was marked as black, and only the cancer-related mark was confirmed as red.
